# Supplementary material for: Towards an Arabic Sign Language (ArSL) corpus for deaf drivers
Source: PeerJ journal article supplement (doi:10.7717/peerj-cs.741), 2021-11-19
Supplement: text_corpus_(our_dataset).pdf [file text_corpus_%28our_dataset%29.pdf]

## Text Dataset (Our Text Corpus)

| Chapter One: Welcome                                             |           |        |                                                                             |                                        |
|------------------------------------------------------------------|-----------|--------|-----------------------------------------------------------------------------|----------------------------------------|
| Correction if the translation is wrong: The video of sign needs. |           |        | Video evaluation based on the related word (phrase) or sentences.<br>√ أو × | Word \ phrase \ sentences              |
| Deleting                                                         | Replacing | Adding |                                                                             |                                        |
|                                                                  |           |        |                                                                             | 1- Salam aleikum (peace be upon you)   |
|                                                                  |           |        |                                                                             | 2- Waleikum salam (lpeace be upon you) |
|                                                                  |           |        |                                                                             | 3- Good bye                            |
|                                                                  |           |        |                                                                             | 4- Good morning                        |
|                                                                  |           |        |                                                                             | 5- Good evening                        |
|                                                                  |           |        |                                                                             | 6- How are you?                        |
|                                                                  |           |        |                                                                             | 7- I'm fine                            |
|                                                                  |           |        |                                                                             | 8- Alhamdulillah (thanks God)          |
|                                                                  |           |        |                                                                             | 9- Thanks                              |
|                                                                  |           |        |                                                                             | 10- I am pleased to meet you           |
|                                                                  |           |        |                                                                             | 11- Well                               |
|                                                                  |           |        |                                                                             | 12- Not bad                            |
|                                                                  |           |        |                                                                             | 13- I'm sorry                          |
|                                                                  |           |        |                                                                             | 14- Sorry (Excuse me).                 |

## Text Dataset (Our Text Corpus)

| Chapter Two: Directions                                          |           |        |                                                                             |                            |
|------------------------------------------------------------------|-----------|--------|-----------------------------------------------------------------------------|----------------------------|
| Correction if the translation is wrong: The video of sign needs. |           |        | Video evaluation based on the related word (phrase) or sentences.<br>√ أو × | Word \ phrase \ sentences  |
| Deleting                                                         | Replacing | Adding |                                                                             |                            |
|                                                                  |           |        |                                                                             | 1- Stop                    |
|                                                                  |           |        |                                                                             | 2- Go ahead                |
|                                                                  |           |        |                                                                             | 3- Move                    |
|                                                                  |           |        |                                                                             | 4- Left                    |
|                                                                  |           |        |                                                                             | 5- Right                   |
|                                                                  |           |        |                                                                             | 6- Forward                 |
|                                                                  |           |        |                                                                             | 7- to-back                 |
|                                                                  |           |        |                                                                             | 8- Around                  |
|                                                                  |           |        |                                                                             | 9- In front                |
|                                                                  |           |        |                                                                             | 10- North                  |
|                                                                  |           |        |                                                                             | 11- South                  |
|                                                                  |           |        |                                                                             | 12- East                   |
|                                                                  |           |        |                                                                             | 13- West                   |
|                                                                  |           |        |                                                                             | 14- Sub-route to the left  |
|                                                                  |           |        |                                                                             | 15- Sub-route to the right |
|                                                                  |           |        |                                                                             | 16- Go back                |
|                                                                  |           |        |                                                                             | 17- In front of you        |
|                                                                  |           |        |                                                                             | 18- Behind you             |
|                                                                  |           |        |                                                                             | 19- Your right             |
|                                                                  |           |        |                                                                             | 20- Your left              |
|                                                                  |           |        |                                                                             | 21- Before                 |
|                                                                  |           |        |                                                                             | 22- After                  |
|                                                                  |           |        |                                                                             | 23- At                     |

## Text Dataset (Our Text Corpus)

|  |  |  |  |             |
|--|--|--|--|-------------|
|  |  |  |  | 24- Between |
|  |  |  |  | 25- Faraway |
|  |  |  |  | 26- Nearby  |
|  |  |  |  | 27- To      |
|  |  |  |  | 28- From    |

| Chapter Three: Places                                            |           |        |                                                                             |                           |
|------------------------------------------------------------------|-----------|--------|-----------------------------------------------------------------------------|---------------------------|
| Correction if the translation is wrong: The video of sign needs. |           |        | Video evaluation based on the related word (phrase) or sentences.<br>√ أو × | Word \ phrase \ sentences |
| Deleting                                                         | Replacing | Adding |                                                                             |                           |
|                                                                  |           |        |                                                                             | 1- House (home)           |
|                                                                  |           |        |                                                                             | 2- School                 |
|                                                                  |           |        |                                                                             | 3- Mosque                 |
|                                                                  |           |        |                                                                             | 4- Hospital               |
|                                                                  |           |        |                                                                             | 5- Clinic                 |
|                                                                  |           |        |                                                                             | 6- Pharmacy               |
|                                                                  |           |        |                                                                             | 7- Institute              |
|                                                                  |           |        |                                                                             | 8- Gas station            |
|                                                                  |           |        |                                                                             | 9- Kindergarten           |
|                                                                  |           |        |                                                                             | 10- Cafe Shop             |
|                                                                  |           |        |                                                                             | 11- Supermarket           |
|                                                                  |           |        |                                                                             | 12- Clothes Shop          |
|                                                                  |           |        |                                                                             | 13- Housewares shop       |
|                                                                  |           |        |                                                                             | 14- Grocery               |
|                                                                  |           |        |                                                                             | 15- Restaurant            |
|                                                                  |           |        |                                                                             | 16- Factory               |

## Text Dataset (Our Text Corpus)

|  |  |  |  |                      |
|--|--|--|--|----------------------|
|  |  |  |  | 17- Company          |
|  |  |  |  | 18- Gym              |
|  |  |  |  | 19- Mall             |
|  |  |  |  | 20- Association      |
|  |  |  |  | 21- Deaf Association |
|  |  |  |  | 22- Beauty salon     |

| <b>Chapter Four: Traffic and Transportation</b>                         |                  |               |                                                                                    |                                  |
|-------------------------------------------------------------------------|------------------|---------------|------------------------------------------------------------------------------------|----------------------------------|
| <b>Correction if the translation is wrong: The video of sign needs.</b> |                  |               | <b>Video evaluation based on the related word (phrase) or sentences.</b><br>√ أو × | <b>Word \ phrase \ sentences</b> |
| <b>Deleting</b>                                                         | <b>Replacing</b> | <b>Adding</b> |                                                                                    |                                  |
|                                                                         |                  |               |                                                                                    | 1- Street                        |
|                                                                         |                  |               |                                                                                    | 2- Bridge                        |
|                                                                         |                  |               |                                                                                    | 3- Bump                          |
|                                                                         |                  |               |                                                                                    | 4- Narrow road                   |
|                                                                         |                  |               |                                                                                    | 5- Taxi                          |
|                                                                         |                  |               |                                                                                    | 6- Car                           |
|                                                                         |                  |               |                                                                                    | 7- Train                         |
|                                                                         |                  |               |                                                                                    | 8- Bus                           |
|                                                                         |                  |               |                                                                                    | 9- Truck                         |
|                                                                         |                  |               |                                                                                    | 10- Police car                   |
|                                                                         |                  |               |                                                                                    | 11- Ambulance                    |

## Text Dataset (Our Text Corpus)

|  |  |  |  |                           |
|--|--|--|--|---------------------------|
|  |  |  |  | 12- Driving License       |
|  |  |  |  | 13- Vehicle Registration  |
|  |  |  |  | 14- Traffic Violation     |
|  |  |  |  | 15- Over Speed            |
|  |  |  |  | 16- Minimum speed limit   |
|  |  |  |  | 17- Seat belt             |
|  |  |  |  | 18- Accident              |
|  |  |  |  | 19- Insurance             |
|  |  |  |  | 20- Third party insurance |
|  |  |  |  | 21- Traffic light         |
|  |  |  |  | 22- Green light           |
|  |  |  |  | 23- Yellow light          |
|  |  |  |  | 24- Red light             |
|  |  |  |  | 25- Pedestrian crossing   |
|  |  |  |  | 26- No waiting            |
|  |  |  |  | 27- No left U-turn        |
|  |  |  |  | 28- No right U-turn       |
|  |  |  |  | 29- No U-turn             |
|  |  |  |  | 30- No right turn         |
|  |  |  |  | 31- No left turn          |

## Text Dataset (Our Text Corpus)

|  |  |  |  |                             |
|--|--|--|--|-----------------------------|
|  |  |  |  | 32- Stop, Check point       |
|  |  |  |  | 33- Double way              |
|  |  |  |  | 34- Sub way                 |
|  |  |  |  | 35- Main way                |
|  |  |  |  | 36- Slow down, U-turn ahead |
|  |  |  |  | 37- Road closed             |
|  |  |  |  | 38- Tunnel                  |
|  |  |  |  | 39- Sidewalk                |
|  |  |  |  | 40- Destination             |
|  |  |  |  | 41- Place                   |
|  |  |  |  | 42- District                |
|  |  |  |  | 43- Roundabout              |
|  |  |  |  | 44- Crossroads              |

| <b>Chapter Five: Driver</b>                                             |                  |               |                                                                                    |                                  |
|-------------------------------------------------------------------------|------------------|---------------|------------------------------------------------------------------------------------|----------------------------------|
| <b>Correction if the translation is wrong: The video of sign needs.</b> |                  |               | <b>Video evaluation based on the related word (phrase) or sentences.</b><br>√ أو × | <b>Word \ phrase \ sentences</b> |
| <b>Deleting</b>                                                         | <b>Replacing</b> | <b>Adding</b> |                                                                                    |                                  |
|                                                                         |                  |               |                                                                                    | 1- Can you give me your address? |
|                                                                         |                  |               |                                                                                    | 2- Do you speak Arabic?          |

## Text Dataset (Our Text Corpus)

|  |  |  |  |                                                      |
|--|--|--|--|------------------------------------------------------|
|  |  |  |  | 3- I did not understand what you said.               |
|  |  |  |  | 4- Where are you going?                              |
|  |  |  |  | 5- Give me a moment                                  |
|  |  |  |  | 6- My car is off                                     |
|  |  |  |  | 7- How will you pay, cash or account?                |
|  |  |  |  | 8- Do you have cash to pay the full amount?          |
|  |  |  |  | 9- Do I put the rest in your account?                |
|  |  |  |  | 10- I will put the rest of the amount in the account |
|  |  |  |  | 11- You have a previous debt account                 |
|  |  |  |  | 12- Do you want to repay the previous debt           |
|  |  |  |  | 13- The total cost of the current trip is ...        |
|  |  |  |  | 14- Where is the place?                              |
|  |  |  |  | 15- I did not understand                             |
|  |  |  |  | 16- We have arrived                                  |
|  |  |  |  | 17- Do you want any other service?                   |
|  |  |  |  | 18- Have you finished the journey?                   |
|  |  |  |  | 19- I can not talk                                   |
|  |  |  |  | 20- Please, write your address                       |
|  |  |  |  | 21- Sorry, there is another client                   |
|  |  |  |  | 22- Sorry, I can not                                 |

## Text Dataset (Our Text Corpus)

|  |  |  |  |                                                 |
|--|--|--|--|-------------------------------------------------|
|  |  |  |  | 23- Talk to the company                         |
|  |  |  |  | 24- Is this the right address?                  |
|  |  |  |  | 25- Which road would you like to take?          |
|  |  |  |  | 26- This road is very crowded.                  |
|  |  |  |  | 27- There is another faster road                |
|  |  |  |  | 28- Do you walk the ring road?                  |
|  |  |  |  | 29- soon I will reach to the destination        |
|  |  |  |  | 30- Please tie the belt                         |
|  |  |  |  | 31- Do you want me to wait for you?             |
|  |  |  |  | 32- At your service                             |
|  |  |  |  | 33- Who will pay the bill?                      |
|  |  |  |  | 34- Sorry for making you wait                   |
|  |  |  |  | 35- I apologize for not being able to serve you |

| <b>Chapter Six: Passenger</b>                                           |                  |               |                                                                          |  |                                         |
|-------------------------------------------------------------------------|------------------|---------------|--------------------------------------------------------------------------|--|-----------------------------------------|
| <b>Correction if the translation is wrong: The video of sign needs.</b> |                  |               | <b>Video evaluation based on the related word (phrase) or sentences.</b> |  | <b>Word \ phrase \ sentences</b>        |
| <b>Deleting</b>                                                         | <b>Replacing</b> | <b>Adding</b> | √ أو ×                                                                   |  |                                         |
|                                                                         |                  |               |                                                                          |  | 1- I can not pay the amount             |
|                                                                         |                  |               |                                                                          |  | 2- I do not have cash to pay the amount |



## Text Dataset (Our Text Corpus)

|  |  |  |  |                                                |
|--|--|--|--|------------------------------------------------|
|  |  |  |  | 3- I will call the company                     |
|  |  |  |  | 4- Wait a little                               |
|  |  |  |  | 5- I want to finish the journey                |
|  |  |  |  | 6- Long way                                    |
|  |  |  |  | 7- Will you take the ring road?                |
|  |  |  |  | 8- How much is the total amount?               |
|  |  |  |  | 9- How much is the current trip amount?        |
|  |  |  |  | 10- How much is the previous trip?             |
|  |  |  |  | 11- Put the rest of the amount in my account   |
|  |  |  |  | 12- I sent to you the destination's directions |
|  |  |  |  | 13- Did you understand what I mean?            |
|  |  |  |  | 14- Hey, stop here                             |
|  |  |  |  | 15- What happened?                             |
|  |  |  |  | 16- Why did you go this way?                   |
|  |  |  |  | 17- He/she will pay the bill                   |
|  |  |  |  | 18- We will share payment of the invoice       |
|  |  |  |  | 19- Please, go fast.                           |
|  |  |  |  | 20- Please, do not go fast.                    |
|  |  |  |  | 21- You pass the destination                   |
|  |  |  |  | 22- Be careful, there is a car                 |

## Text Dataset (Our Text Corpus)

|  |  |  |  |                                    |
|--|--|--|--|------------------------------------|
|  |  |  |  | 23- Give me the rest of the amount |
|--|--|--|--|------------------------------------|

| Chapter Seven: General Words                                     |           |        |                                                                             |                           |
|------------------------------------------------------------------|-----------|--------|-----------------------------------------------------------------------------|---------------------------|
| Correction if the translation is wrong: The video of sign needs. |           |        | Video evaluation based on the related word (phrase) or sentences.<br>√ أو × | Word \ phrase \ sentences |
| Deleting                                                         | Replacing | Adding |                                                                             |                           |
|                                                                  |           |        |                                                                             | 1- No                     |
|                                                                  |           |        |                                                                             | 2- Well                   |
|                                                                  |           |        |                                                                             | 3- Yes                    |
|                                                                  |           |        |                                                                             | 4- No                     |
|                                                                  |           |        |                                                                             | 5- Because                |
|                                                                  |           |        |                                                                             | 6- In order               |
|                                                                  |           |        |                                                                             | 7- By                     |
|                                                                  |           |        |                                                                             | 8- Too                    |
|                                                                  |           |        |                                                                             | 9- Also                   |
|                                                                  |           |        |                                                                             | 10- And                   |
|                                                                  |           |        |                                                                             | 11- Whenever              |
|                                                                  |           |        |                                                                             | 12- With                  |
|                                                                  |           |        |                                                                             | 13- For                   |
|                                                                  |           |        |                                                                             | 14- So                    |

## Text Dataset (Our Text Corpus)

|  |  |  |  |                |
|--|--|--|--|----------------|
|  |  |  |  | 15- always     |
|  |  |  |  | 16- I          |
|  |  |  |  | 17- You        |
|  |  |  |  | 18- Some times |
|  |  |  |  | 19- on         |
|  |  |  |  | 20- During     |
|  |  |  |  | 21- About      |

| Chapter Eight: Amount                                            |           |        |                                                                             |                           |
|------------------------------------------------------------------|-----------|--------|-----------------------------------------------------------------------------|---------------------------|
| Correction if the translation is wrong: The video of sign needs. |           |        | Video evaluation based on the related word (phrase) or sentences.<br>√ أو × | Word \ phrase \ sentences |
| Deleting                                                         | Replacing | Adding |                                                                             |                           |
|                                                                  |           |        |                                                                             | Dollar                    |
|                                                                  |           |        |                                                                             | 1 Riyal                   |
|                                                                  |           |        |                                                                             | 2 Riyals                  |
|                                                                  |           |        |                                                                             | 3 Riyals                  |
|                                                                  |           |        |                                                                             | 4 Riyals                  |
|                                                                  |           |        |                                                                             | 5                         |
|                                                                  |           |        |                                                                             | 6                         |
|                                                                  |           |        |                                                                             | 7                         |
|                                                                  |           |        |                                                                             | 8                         |
|                                                                  |           |        |                                                                             | 9                         |
|                                                                  |           |        |                                                                             | 10                        |
|                                                                  |           |        |                                                                             | 11                        |
|                                                                  |           |        |                                                                             | 12                        |
|                                                                  |           |        |                                                                             | 13                        |
|                                                                  |           |        |                                                                             | 14                        |
|                                                                  |           |        |                                                                             | 15                        |
|                                                                  |           |        |                                                                             | 16                        |
|                                                                  |           |        |                                                                             | 17                        |

## Text Dataset (Our Text Corpus)

|  |  |  |  |     |
|--|--|--|--|-----|
|  |  |  |  | 18  |
|  |  |  |  | 19  |
|  |  |  |  | 20  |
|  |  |  |  | 21  |
|  |  |  |  | 22  |
|  |  |  |  | 23  |
|  |  |  |  | 24  |
|  |  |  |  | 25  |
|  |  |  |  | 26  |
|  |  |  |  | 27  |
|  |  |  |  | 28  |
|  |  |  |  | 29  |
|  |  |  |  | 30  |
|  |  |  |  | 100 |
